# Supplementary material for: Producing more grain with lower environmental costs
Source: Springer Nature journal article supplement (doi:10.1038/nature13609), 2014-09-02
Supplement: 41586_2014_BFnature13609_MOESM38_ESM.pdf [file 41586_2014_BFnature13609_MOESM38_ESM.pdf]

**Extended reference list for establishing the reactive N loss models, including 134 references with 787 observations.**

1. Cao, C.G., Li, C.F., Kou, Z.K. & Wang, J.P. Effects of N source and tillage on NH<sub>3</sub> volatilization from paddy soil. *Acta Agriculturae Universitatis Jiangxiensis***32**, 881-886 (2010) (in Chinese with English abstract).
2. Deng, M.H., Yin, B., Zhang, S.L. & Shi, X.J. Effects of rate and method of N application on ammonia volatilization in paddy fields. *Soils***38**, 263-269(2006) (in Chinese with English abstract).
3. Deng, M.H. *et al.* Optimizing nitrogen fertilizer application for rice production in the taihu lake region, China. *Pedosphere***22**, 48-57(2012).
4. Gong, W.W., Zhang, Y.S., Huang, X.F. & Luan, S.J. High-resolution measurement of ammonia emissions from fertilization of vegetable and rice crops in the Pearl River Delta Region. *Atmospheric Environment***65**, 1-10 (2013).
5. Huang, J.B., Fan, X.H. & Zhang, S.L. Ammonia volatilization from nitrogen fertilizer in the rice field of Fe leachi stagnic anthrosols in the Taihu Lake region. *Acta Pedologica Sinica***43**, 786-792(2006) (in Chinese with English abstract).
6. Li, H., Liang, X.Q., Chen, Y.X. & Zhang, Z.J. Ammonia volatilization from urea in rice fields with zero-drainage water management. *Agricultural Water Management***95**, 887-894(2008).
7. Li, H.L., Han, Y. & Cai, Z.C. Modeling the ammonia volatilization from common urea and controlled releasing urea fertilizers in paddy soil of Taihu region of China by Jayaweera-Mikkelsen model. *Environment Science***29**, 1045-1052 (2008) (in Chinese with English abstract).
8. Li, J.M., Xu, M.G., Qin, D.Z. & Kazuyuki, Y. Effects of chemical fertilizers application combined with manure on ammonia volatilization and rice yield in red paddy soil. *Plant Nutrition and Fertilizer Science***11**, 51-56 (2005) (in Chinese with English abstract).
9. Li, C.F., Gao, C.G., Wang, J.P. & Shahrear, A. Nitrogen losses from integrated rice–duck and rice–fish ecosystems in southern China. *Plant and Soil***307**, 207-217(2008).
10. Liang, X.Q. *et al.* Modeling transport and fate of nitrogen from urea applied to a near-trench paddy

- field. *Environmental Pollution***150**, 313-320(2007).
11. Ning, W.J. Studies on the effect of rice chaff and duckweeds on growth and yield of no-tillage cast transplanting rice and ammonia volatilization in paddy soil. Master thesis, Guangxi University (2008) (in Chinese with English abstract).
  12. Peng, S.Z., Yang, S.H. & Xu, J.Z. Ammonia volatilization and its influence factors of paddy field under water-saving irrigation. *Transactions of the CSAE***25**, 35-39(2009) (in Chinese with English abstract).
  13. Shi, Y.W. Studies on ammonia volatilization and greenhouse gas emissions in different cultivation modes under double-harvest rice system. Master thesis, Hunan Agricultural University (2012) (in Chinese with English abstract).
  14. Song, Y.H., Fan, X.H., Lin, D.X. & Zhou, J.M. Ammonia volatilization from paddy fields in the Taihu Lake region and its influencing factors. *Acta Pedologica Sinica* **41**, 265-269 (2004).
  15. Zhu, X.H. *et al.* Effect of fertilization on ammonia volatilization from paddy fields in Chao Lake basin. *Acta Ecologica Sinica* **32**, 2119-2126(2012) (in Chinese with English abstract).
  16. Su, C.G. Ammonia volatilization and atmospheric wet deposition of nitrogen in rice-wheat rotation system in Taihu region. Master thesis, Nanjing Agricultural University (2004) (in Chinese with English abstract).
  17. Ti, C.P. Regional nitrogen budget at different spatial scales. PHD thesis, Nanjing Agricultural University(2011) (in Chinese with English abstract).
  18. Tian, G.M., Cai, Z.C., Cao, J.L. & Li, X.P. Ammonia volatilization from paddy field and its affecting factors in Zhenjiang Hilly region. *Acta Pedologica Sinica* **38**, 324-332 (2001) (in Chinese with English abstract).
  19. Tian, Y.H., He, F.Y., Yin, B. & Zhu, Z.L. Ammonia volatilization from paddy fields in the Taihu Lake region as affected by N and P combination in fertilization. *Acta Pedologica Sinica***44**, 893-900(2007) (in Chinese with English abstract).
  20. Wang, C. *et al.* Effects of different nitrogen application rates on ammonia volatilization from paddy fields under double-harvest rice system. *Plant Nutrition and Fertilizer Science***18**, 349-358 (2012) (in Chinese with English abstract).

21. Wang, J., Wang, D.J., Zhang, G. & Wang, C. Effect of wheat straw application on ammonia volatilization from urea applied to a paddy field. *Nutrient Cycling in Agroecosystems* **94**, 73-84 (2012).
22. Wu, P. P. *et al.* Effects of different fertilization systems on ammonia volatilization from double-rice cropping field in red soil region. *Chinese journal of Rice Science* **23**, 85-93(2009) (in Chinese with English abstract).
23. Xia, W.J. *et al.* Effect of optimized nitrogen application on ammonia volatilization from paddy field under wheat-rice rotation system. *Plant Nutrition and Fertilizer Science* **16**, 6-13(2010) (in Chinese with English abstract).
24. Xing, G.X. & Zhu, Z.L. An assessment of N loss from agricultural fields to the environment in China. *Nutrient Cycling in Agroecosystems* **57**, 67-73 (2005).
25. Xu, J.Z., Peng, S.Z., Yang, S.H. & Wang, W.G. Ammonia volatilization losses from a rice paddy with different irrigation and nitrogen managements. *Agricultural Water Management* **104**, 184-192 (2012).
26. Xu, L.S. Study on optimization mode for nitrogen fertilizer application of rice and environmental effect in Taihu region. Master thesis, Yangzhou University. (2006) (in Chinese with English abstract).
27. Xu, R.L. Effects of straw applying on rice yield, quality and environment. PHD thesis, Yangzhou University (2010) (in Chinese with English abstract).
28. Yan, J. Studies on optimum nitrogen application and improving fertilizer-N use efficiency in rice-wheat rotation system in Taihu Lake region. PHD thesis, Nanjing Agricultural University(2009) (in Chinese with English abstract).
29. Yang, S.H. *et al.* Characteristics and simulation of ammonia volatilization from paddy fields under different water and nitrogen management. *Transactions of the Chinese Society of Agricultural Engineering* **28**, 99-104(2012) (in Chinese with English abstract).
30. Ye, S.C. *et al.* Effects of nitrogen application rate on ammonia volatilization and nitrogen utilization in rice growing season. *Chinese Journal of Rice Science* **25**, 71-78(2011) (in Chinese with English abstract).
31. Yu, Q.G. *et al.* Effects of different nitrogen application levels on rice nutrient uptake and ammonia volatilization. *Chinese journal of Rice Science* **26**, 487-494 (2012) (in Chinese with English abstract).

32. Zhang, J. & Wang, D.J. Ammonia volatilization in gleyed paddy field soils of Taihu Lake region. *Chinese Journal of Eco-Agriculture***15**, 84-87(2007) (in Chinese with English abstract).
33. Zhang, Y., Chen, D., Zhang, J. & Zhu, A. Ammonia volatilization and denitrification losses from an irrigated maize-wheat rotation field in the North China Plain. *Pedosphere* **14**, 533-540(2004).
34. Zhao, L.M., Wu, L.H. & Wu, M.Y. Effects of SRI on rice yield, water productivity and NH<sub>3</sub> volatilization from soil with different N application rates. *Chinese journal of Soil Science***40**, 576-579(2009) (in Chinese with English abstract).
35. Cai, G.X. *et al.* Nitrogen losses from fertilizers applied to maize, wheat and rice in the North China Plain. *Nutrient Cycling in Agroecosystems***63**, 187-195(2002).
36. Zhang, J.S. *et al.* Emissions of N<sub>2</sub>O and NH<sub>3</sub>, and nitrogen leaching from direct seeded rice under different tillage practices in central China. *Agriculture, Ecosystems & Environment***140**, 164-173(2011).
37. Bian, X.J. *et al.* Fate of fertilizer nitrogen applied to spring wheat growing on a meadow chestnut soil in plateau of north Hebei province (in Chinese with English abstract). *Acta Pedol. Sin.***34**, 60-65 (1997).
38. Cai, G. *et al.* Gaseous nitrogen losses from urea applied to maize on a calcareous fluvo-aquic soil in the North China Plain. *Aust. J. Soil Res.***40**, 737-748 (2002).
39. Cai, G.X. *et al.* Nitrogen losses from fertilizers applied to maize, wheat and rice in the North China Plain. *Nutr Cycl Agroecosys***63**, 187-195 (2002).
40. Cai, G.X., Fan, X.H., Zhen, Y. & Zhu, Z.L. Gaseous loss of nitrogen from fertilizers applied to wheat on a calcareous soil in North China Plain. *Pedosphere***8**, 45-52 (1998).
41. Ding, X.Q. Ammonia volatilization from nitrogen fertilization in winter wheat-summer maize rotation system in the North China Plain. Dissertation. Beijing: China Agricultural University (2005).
42. Fan, X.H. *et al.* Ammonia volatilization losses from urea applied to wheat on a paddy soil in Taihu region, China. *Pedosphere***15**, 59-65 (2005).
43. Hayashi, K. & Yan, X. Y. Airborne nitrogen load in Japanese and Chinese agroecosystems. *Soil Sci. Plant Nutri.***56**, 2-18 (2010).

44. Ju, X. T. *et al.* Reducing environmental risk by improving N management in intensive Chinese agricultural systems. *Pro. Natl. Acad. Sci. USA* **106**,3041-3046 (2009).
45. Li, G. T., Li, B. G. & Chen, D. L. Ammonia volatilization from large field planted with winter wheat and summer maize. *Acta Agric. Boreali-Sin***17**, 76-81 (2002) (in Chinese with English abstract).
46. Li, G.T., Li, B.G. & Chen, D.L. Method for measurement of ammonia volatilization from large area field by bowen ratio system. *J. China Agric. Univ.***6**, 56-62 (2001) (in Chinese with English abstract).
47. Pacholsk, A. *et al.* Calibration of a simple method for determining ammonia volatilization in the field: comparative measurements in Henan Province, China. *Nutr. Cycl. Agroecosys***74**, 259-273 (2006).
48. Pacholsk, A. *et al.* Comparison of different methods for the measurement of ammonia volatilization after urea application in Henan province, China. *J. Plant Nutr. Soil Sci***171**, 361-369 (2008).
49. Su, F. *et al.* Ammonia volatilization from nitrogen fertilization of winter wheat-summer maize rotation system in the North China Plain. *China Environ. Sci.***27**, 409-413 (2009) (in Chinese with English abstract).
50. Xiao, X.H. Quantitative evaluation of water and nitrogen under winter wheat-summer maize cropping system in irrigative field. Dissertation. Beijing: China Agricultural University (2004) (in Chinese with English abstract).
51. Zhang, Z.P. *et al.* Loss of nitrogen by ammonia volatilization and denitrification after application of urea to maize in Shanxi Province, China. *Soil Res.***49**, 462-469 (2011).
52. Zhang, S.L. *et al.* Losses of urea-nitrogen applied to maize grown on a calcareous fluvo-aquic soil in North China Plain. *Pedosphere***2**, 171-178 (1992).
53. Zhang, S. L. *et al.* Losses of urea-nitrogen applied to maize grown on a calcareous fluvo-aquic soil in North China Plain. *Soils* **5**, 271 (1991) (in Chinese with English abstract).
54. Zhang, Y.M. *et al.* Ammonia volatilization and denitrification losses from an irrigated maize-wheat rotation field in the north china plain. *Pedosphere***14**, 533-540 (2004).
55. Zhang, Y.M. *et al.* Nitrogen cycling and balance in agricultural ecosystem in piedmont plain of Taihang Mountains (in Chinese with English abstract). *Plant Nutr. Fert. Sci.***12**, 5-11 (2006).
56. Zhang, Y.M., Hu, C.S., Zhang, J.B. & Chen, D.L. Nitrogen balance in intensive agriculture in the

- north China Plain. The Proceedings of the International Plant Nutrition Colloquium XVI, Dept. Plant Sci., UC Davis, USA (2009).
57. Zhang, Y.M. Nitrogen cycling and balance in wheat-maize rotation field in Piedmont Plain of MT Taihang in the North China Plain. Dissertation. Beijing: China Agricultural University. (2004).
  58. Zhang, Y.M., Hu, C.S. & Dong, W.X. Ammonia volatilization from wheat-maize rotation field in the piedmont of Taihang. *Plant Nutr. Fert. Sci.* **11**, 417-419 (2005) (in Chinese with English abstract).
  59. Zhao, R.F., Chen, X.P. & Zhang, F.S. Nitrogen cycling and balance in winter wheat and summer maize rotation system in North China Plain. *Acta Pedol. Sin.* **46**, 684-697 (2009) (in Chinese with English abstract).
  60. Zhao, R.F. *et al.* Fertilization and nitrogen balance in a wheat-maize rotation system in North China Plain. *Agron. J.* **98**, 938-945 (2006).
  61. Hou, H.J., Peng, S.Z., Xu, J.Z. & Mao, Z. Seasonal variations of CH<sub>4</sub> and N<sub>2</sub>O emissions in response to water management of paddy fields located in Southeast China. *Chemosphere* **89**, 884-892(2012).
  62. Huang, M.W. Emission process of greenhouse gases and its mechanism from the paddy-wheat rotation agro-ecosystem. Master thesis, East China Normal University (2007) (in Chinese with English abstract).
  63. Li, X.L., Yuan, W.P., Xu, H. & Yagi, K. Effect of timing and duration of midseason aeration on CH<sub>4</sub> and N<sub>2</sub>O emissions from irrigated lowland rice paddies in China. *Nutrient Cycling in Agroecosystems* **91**, 293-305 (2011).
  64. Li, X.L., Zhang, G.B., Xu, H. & Yagi, K. Effect of timing of joint application of hydroquinone and dicyandiamide on nitrous oxide emission from irrigated lowland rice paddy field. *Chemosphere* **75**, 1417-1422 (2009).
  65. Liu, C., Wang, K. & Zheng, X. Responses of N<sub>2</sub>O and CH<sub>4</sub> fluxes to fertilizer nitrogen addition rates in an irrigated wheat-maize cropping system in northern China. *Biogeosciences* **9**, 839-850 (2012).
  66. Liu, S.W., Qin, Y.M., Zou, J.W. & Liu, Q.H. Effects of water regime during rice-growing season on annual direct N<sub>2</sub>O emission in a paddy rice-winter wheat rotation system in southeast China. *Sci. Total Environ.* **408**, 906-913(2010).

67. Ma, J., Ma, E., Xu, H. & Cai, Z.C. Wheat straw management affects CH<sub>4</sub> and N<sub>2</sub>O emissions from rice fields. *Soil Biology and Biochemistry* **41**, 1022-1028 (2009).
68. Qin, X.B., Li, Y.E., Liu, K.Y. & Wan, Y.F. Methane and nitrous oxide emission from paddy field under different fertilization treatments. *Transactions of the CSAE* **22**, 143-148 (2006) (in Chinese with English abstract).
69. Shang, Q.Y. *et al.* Net annual global warming potential and greenhouse gas intensity in Chinese double rice-cropping systems: a 3-year field measurement in long-term fertilizer experiments. *Global Change Biology* **17**, 2196-2210 (2011).
70. Wang, J.Y., Jia, J.X., Xiong, Z.Q. & Xing, G.X. Water regime–nitrogen fertilizer–straw incorporation interaction: field study on nitrous oxide emissions from a rice agroecosystem in Nanjing, China. *Agriculture, Ecosystems & Environment* **141**, 437-446 (2011).
71. Wang, X.B. *et al.* Effect of optimized nitrogen application on denitrification losses and N<sub>2</sub>O emission from soil in winter wheat-summer corn rotation system in North China. *Plant Nutrition and Fertilizer Science* **15**, 48-54 (2009) (in Chinese with English abstract).
72. Wu, P.P. *et al.* Effect of different fertilization systems on ammonia volatilization from double rice cropping field in red soil region. *China J. Rice Sci.* **23**, 85-93 (2009) (in Chinese with English abstract).
73. Wu, W.M., Yang, G.M. & Sha, L.Q. Impact of nitrogen fertilizer on N<sub>2</sub>O flux from a paddy soil in Xishuangbanna, Southwest China. *Journal of Agro-Environment Science* **27**, 1876-1881 (2008) (in Chinese with English abstract).
74. Xiao, Y., Xie, G.D. & Lu, C.X. Economic values of nitrogen transformation in rice field ecosystems. *Chinese journal of Applied Ecology* **16**, 1745-1750 (2005) (in Chinese with English abstract).
75. Xing, G.X. *et al.* N<sub>2</sub>O emission from cropland in China. *Nutrient Cycling in Agroecosystems* **52**, 249-254 (1998).
76. Xing, G.X. *et al.* Nitrous oxide emissions from paddy soil in three rice-based cropping systems in China. *Nutrient Cycling in Agroecosystems* **64**, 135-143 (2002).
77. Yang, X.X. Study on methane and nitrous oxide emission in double-crop rice fields at red paddy soil under long-term different fertilizer systems. Master thesis, Nanjing Agricultural University (2010) (in Chinese).

- Chinese with English abstract).
78. Zhang, Y., Dong, W., Zeng, J. & Chen, D. Dynamic of denitrification rate and N<sub>2</sub>O flux in maize field. *Chinese Journal of Eco-Agriculture***9**, 74-76(2001) (in Chinese with English abstract).
79. Zhang, Y., Liu, J., Mu, Y. & Chai, F. Emissions of nitrous oxide, nitrogen oxides and ammonia from a maize field in the North China Plain. *Atmospheric Environment***45**, 2956-2961(2011).
80. Zhao, D., Yan, T.M., Qiao, J. & Lu, H. Characteristics of N loss and environmental effect of paddy field in Taihu area. *Ecological and Environmental Sciences***21**, 1149-1154 (2012) (in Chinese with English abstract).
81. Zheng, X.H. *et al.* N<sub>2</sub>O emission from rice-wheat ecosystem in Southeast China. *Chinese journal of Applied Ecology***8**, 495-499 (1997) (in Chinese with English abstract).
82. Zou, J.W., Liu, S.W., Qin, Y.M. & Zhu, D.W. Sewage irrigation increased methane and nitrous oxide emissions from rice paddies in southeast China. *Agriculture, Ecosystems & Environment***129**, 516-522(2009).
83. Cai, Y.J., Ding, W.X. & Luo, J.F. Spatial variation of nitrous oxide emission between interrow soil and interrow plus row soil in a long-term maize cultivated sandy loam soil. *Geoderma***181**, 2-10 (2012).
84. Chen, L. Research on nitrogen recycle and its effect on environment in dry-land of loess plateau. Dissertation. Shanxi: Northwest A & F University (2007) (in Chinese with English abstract).
85. Ding, H., Wang, Y.S. & Li, W.H. Denitrification losses and N<sub>2</sub>O emission from different nitrogen fertilizers applied to maize-fluoro-aquic soil system. *Sci. Agric. Sin.* **37**, 1886-1891 (2004) (in Chinese with English abstract).
86. Ding, W.X., Yu, H.Y. & Cai, Z.C. Impact of urease and nitrification inhibitors on nitrous oxide emissions from fluoro-aquic soil in the North China Plain. *Biol. Fertile Soils***47**, 1-9 (2010).
87. Gao, B. *et al.* Nitrous oxide and methane emissions from optimized and alternative cereal cropping systems on the North China Plain: A two-year field study. *Science of Total Environment* **472**, 112-124 (2014)
88. Hu, X.K. *et al.* Greenhouse gas emissions from a wheat-maize double cropping system with different nitrogen fertilization regimes. *Environmental Pollution* **176**, 198-207 (2013).

89. Liu, C.Y. *et al.* Effects of irrigation, fertilization and crop straw management on nitrous oxide and nitric oxide emissions from a wheat–maize rotation field in northern China. *Agr. Ecosyst. Environ.* **140**, 226–233 (2011).
90. Liu, Y.T. *et al.* Nitrous oxide emission from spring-maize field under the application of different nitrogen and phosphorous fertilizers. *J Agro-Environ Sci.* **30**, 1468–1475 (2011) (in Chinese with English abstract).
91. Liu, Y.T. *et al.* Nitrous oxide emissions from irrigated and fertilized spring maize in semi-arid northern China. *Agr. Ecosyst. Environ.* **141**, 287–295 (2011)
92. Ma, Y.L. *et al.* Effects of N fertilization rates on the NH<sub>3</sub> volatilization and N<sub>2</sub>O emissions from the wheat-maize rotation system in North China Plain. *Acta Ecol. Environ.* **21**, 225–230 (2012) (in Chinese with English abstract).
93. Ni, K. *et al.* Nitrous oxide emissions from a rainfed-cultivated black soil in Northeast China: effect of fertilization and maize crop. *Biol. Fertil. Soils* **12**, 709–718 (2012).
94. Shi, P. Effects of long-term application of fertilizer on wheat yield and emission of the CO<sub>2</sub> and N<sub>2</sub>O from soil in loess plateau. Dissertation. Shanxi: Northwest A & F University (2011) (in Chinese with English abstract).
95. Wang, X.B. Nitrogen cycling and balance in winter wheat-summer corn rotation system under optimized nitrogen management. Dissertation. Beijing: Chinese Academy of Agricultural Sciences (2009) (in Chinese with English abstract).
96. Wang, X.B. *et al.* Effect of optimized nitrogen application on denitrification losses and N<sub>2</sub>O emissions from soil in winter wheat-summer corn rotation system in North China. *Plant Nutr. Fert. Sci.* **15**, 48–54 (2009) (in Chinese with English abstract).
97. Zhao, R.F. *et al.* Fertilization and nitrogen balance in a wheat-maize rotation system in North China Plain. *Agron. J.* **98**, 938–945 (2006).
98. Cui, Y.T., Cheng, X., Han, C. & Li, R.G. Rice nitrogen utilization efficiency and nitrogen leaching amount in Taihu Lake watershed of South Jiangsu province. *Journal of China Agricultural University* **3**, 51–54 (1998) (in Chinese with English abstract).

99. Huang, M.W. *et al.* Study on the nitrogen leaching in the paddy-wheat rotation agroecosystem. *Acta Scientiae Circumstantiae***27**, 629-636 (2007) (in Chinese with English abstract).
100. Ji, X.H., Zheng, S.X., Shi, L.H. & Liu, Z.B. Systematic studies of nitrogen loss from paddy soils through leaching in the dongting lake area of China. *Pedosphere***21**, 753-762 (2011).
101. Li, H. Relationship between biologic factors and N, P transformation and losses in paddy fields. PhD thesis, Zhejiang University (2007) (in Chinese with English abstract).
102. Li, R.G., Xia, Y.L., Wu, A.Z. & Qian, Y.S. Water saving irrigation and control of nitrogen leaching in Taihu Lake region. *Journal of Hohai University***29**, 21-26(2001) (in Chinese with English abstract).
103. Liu, H. Study on the utilization of water and nitrogen and the N fertilizer balance under water saving irrigation. Master thesis, Huazhong Agricultural University (2005) (in Chinese with English abstract).
104. Lu, M., Liu, M., Mao, G.F. & Qu, F. Study on nitrogen leaching of paddy soil in the field experiments. *Journal of East China Normal University***4**, 71-77 (2006) (in Chinese with English abstract).
105. Tian, Y.H., Yin, B. & Zhu, Z.L. Study on nitrogen losses via leaching in paddy soil. *Journal of Anhui Agricultural Science***34**, 2792-2794(2006) (in Chinese with English abstract).
106. Wang, G.Q. Study on paddy nitrogen balance under different N and water coupling in typical red soil areas. Master thesis, Nanjing Agricultural University (2007) (in Chinese with English abstract).
107. Wang, D.J., Lin, J.H. & Xia, L.Z. Characteristics of nitrogen leaching of rice-wheat rotation field in Taihu Lake area. *Chinese Journal of Eco-Agriculture***9**, 16-18(2001) (in Chinese with English abstract).
108. Xue, L.H., Yu, Y.L. & Yang, L.Z. Nitrogen balance an environmental impact of paddy field under different N management methods in Taihu Lake region. *Environment Science***32**, 1133-1138 (2011) (in Chinese with English abstract).
109. Yi, S.L. Studies on nitrogen leaching and use efficiency in Rice-Wheat-Rape rotation system. Master thesis, Southwest Agricultural University (2005) (in Chinese with English abstract).
110. Zhao, X. *et al.* Nitrogen fate and environmental consequence in paddy soil under rice-wheat rotation in the Taihu lake region, China. *Plant and Soil***319**, 225-234(2009).
111. Fang, Q.X. *et al.* Soil nitrate accumulation, leaching and crop nitrogen use as influenced by

- fertilization and irrigation in an intensive wheat-maize double cropping system in the North China Plain. *Plant and Soil***284**, 335-350 (2006).
112. Liu, X.J. *et al.* Nitrogen dynamics and budgets in a winter wheat-maize cropping system in the North China Plain. *Field Crops Research*. **83**, 111-124 (2003).
113. Luo, M. Nitrogen recycling in rice-wheat rotation farm system and water environment effect. Dissertation. Shanghai: East China Normal University (2007) (in Chinese with English abstract).
114. Mao, G.F., Luo, M., Huang, M.W. & Li, M. Nitrogen loss in rice-wheat cropping farmland and its control measures. *Acta Agric. Shanghai***22**, 86-92 (2006) (in Chinese with English abstract).
115. Yao, L. Study on the fate of nitrogen in different nutrient management in mustard-maize tuber rotation system. Dissertation. Chongqing: Southwest Agricultural University. (2012) (in Chinese with English abstract).
116. Yi, X.F. Characteristics of nitrogen fertilizer utilization and nitrate-N leaching in the Guangzhong area. Dissertation. Shanxi: Northwest A & F University (2010) (in Chinese with English abstract).
117. Yi, X.F. *et al.* Nitrate leaching characteristics of wheat-corn rotation farmland in Guanzhong area of Shanxi. *China J. Appl. Ecol.***21**, 640-646 (2010) (in Chinese with English abstract).
118. Zhao, R.F. *et al.* Fertilization and nitrogen balance in a wheat-maize rotation system in North China Plain. *Agron. J.***98**, 938-945 (2006).
119. Bian, L.P., Jiao, J., Li, H. & Zhang, W. J. Modeling of nitrogen loss with runoff from paddy field during rice growth period in Nanjing area. *Journal of Ecology and Rural Environment***24**, 89-93 (2008) (in Chinese with English abstract).
120. Chen, K. *et al.* Nitrogen and phosphorus loss by surface runoff in different fertilization levels in Chendu plain. *Southwest China Journal of Agricultural Sciences***22**, 685-689 (2009) (in Chinese with English abstract).
121. Gu, J., Li, Y., Yang, L.Z. & Cheng, W. Research on the dynamic change and runoff loss of nitrogen in the soil surface water of rice fields of direct seeding cultivation. *Journal of Anhui Agricultural Science***37**, 3626-3628 (2009) (in Chinese with English abstract).
122. Liang, X.Q., Tian, G.M., Li, H. & Zhu, S. Study on characteristic of nitrogen and phosphorus loss from

- rice field by natural rainfall runoff. *Journal of Soil and Water Conservation***19**, 59-63(2005) (in Chinese with English abstract).
123. Liu, H.J., Zheng, J.C., Chen, L.G. & Xue, X.H. Effects of straw-returning on annual overland runoff NPK loss in farmland. *Ecological and Environmental Sciences***21**, 1031-1036 (2012) (in Chinese with English abstract).
124. Lu, M., Liu, M., Huang, M.W. & Mao, G.F. Field study of nitrogen loss in soil with rice-wheat rotation system. *Journal of Agro-Environment Science***25**, 1234-1239(2006) (in Chinese with English abstract).
125. Lu, Y.L., Ji, X.H., Zheng, S.X. & Liao, Y.L. Effect of controlled-release nitrogen fertilizer on reducing nitrogen runoff loss and increasing nitrogen recovery efficiency of rice plant. *Plant Nutrition and Fertilizer Science***14**, 490-495 (2008) (in Chinese with English abstract).
126. Mao, G.F., Lu, M., Huang, M.W. & Liu, M. Nitrogen loss in rice-wheat cropping farmland and its control measures. *Acta Agriculturae Shanghai***22**, 86-92 (2006) (in Chinese with English abstract).
127. Qiao, J., Yang, L.Z., Yan, T.M. & Zhao, D. Nitrogen fertilizer reduction in rice production for two consecutive years in the Taihu Lake area. *Agriculture, Ecosystems & Environment* **146**, 103-112(2012).
128. Shan, Y.H., Yang, L.Z., Yan, T.M. & Wang, J.G. The variation of P and N contents in paddy soil water and its environmental effect. *Acta Ecologica Sinica***25**, 115-121 (2005)(in Chinese with English abstract).
129. Wang, G.L. *et al.* Study of nitrogen and phosphorus runoff in wheat-rice rotation farmland in Chao Lake basin. *Journal of Soil and Water Conservation***24**, 6-10(2010) (in Chinese with English abstract).
130. Wang, J., Guo, X.S., Wang, Y.Q. & Ding, S.W. Effects of conservation tillage and balanced fertilization on nitrogen loss from paddy field and rice yields in Chaohu region. *Journal of Agro-Environment Science***29**, 1164-1171 (2010) (in Chinese with English abstract).
131. Wang, X.Z., Gao, R., Zhu, J.G. & Feng, K. Nitrogen loss via runoff and leaching from soil as a function of types of urea applied in wheat season. *Rural Eco-Environment***21**, 24-29 (2005) (in Chinese with English abstract).
132. Wang, X.Z., Zhu, J.G., Gao, R. & Feng, K. Nitrogen cycling and losses under rice-wheat rotations with

- coated urea and urea in the taihu lake region. *Pedosphere***17**,62-69 (2007).
133. Zhu, P.P., Chang, Z.Z., Zheng, J.C. & Chen, L. G. Nitrogen and phosphorus loss from rice field under the main cropping pattern and its profit analysis in Taihu lake region. *Jiangsu Agricul. Sci.***3**, 216-218(2007) (in Chinese with English abstract).
134. Huang, D.F., Li W.H., Wang, L.M., Lin X.J., Fan, P. & Qiu X.X. Effects of water and fertilizer managements on yield, nutrition uptake of rice and loss of nitrogen and phosphorus by runoff from paddy field. *J. Soil and Water Conser.***27** 62-66 (2013) (in Chinese with English abstract).

**Table S1** Factors for GHG emissions from fertilizer and pesticide production and transportation, and energy use for irrigation and soil tillage, derived from the footnoted reference(s) for each factor.

| Input                                                 | unit                             | GHG emissions                         |                 |                  |       |
|-------------------------------------------------------|----------------------------------|---------------------------------------|-----------------|------------------|-------|
|                                                       |                                  | (kg CO <sub>2</sub> e per unit input) |                 |                  |       |
|                                                       |                                  | CO <sub>2</sub>                       | CH <sub>4</sub> | N <sub>2</sub> O | Total |
| N fertilizer production <sup>1</sup>                  | kg N                             | 7.61                                  | 0.56            | 0.03             | 8.21  |
| P fertilizer production <sup>2</sup>                  | kg P <sub>2</sub> O <sub>5</sub> | 0.71                                  | 0.02            | 0.00             | 0.73  |
| K fertilizer production <sup>2</sup>                  | kg K <sub>2</sub> O              | 0.48                                  | 0.02            | 0.00             | 0.50  |
| N fertilizer transportation <sup>3-7</sup>            | kg N                             | 0.08                                  | 0.00            | 0.00             | 0.09  |
| P fertilizer transportation <sup>3-7</sup>            | kg P <sub>2</sub> O <sub>5</sub> | 0.05                                  | 0.00            | 0.00             | 0.06  |
| K fertilizer transportation <sup>3-7</sup>            | kg K <sub>2</sub> O              | 0.04                                  | 0.00            | 0.00             | 0.05  |
| Pesticides production and transportation <sup>8</sup> | kg                               | 18.28                                 | 0.80            | 0.05             | 19.12 |
| Electricity for irrigation <sup>4</sup>               | kWh                              | -                                     | -               | -                | 1.14  |
| Diesel fuel <sup>4-6</sup>                            | kg                               | 3.38                                  | 0.01            | 0.36             | 3.75  |

## Supplementary Discussion –Increasing yield and reducing N input

How can we increase crop yield significantly in the future? Which approaches will be available? Our results show that within our Integrated Soil-crop System Management (ISSM) (described in the main text) only relatively small increases in harvest index (HI) are possible; the average maximum HI for rice, wheat and maize are 0.54, 0.49 and 0.52, respectively. The large yield increases we were able to obtain from increased biomass in current cultivars (Extended Data Table 2). This result is in agreement with previous reports by crop breeders and as well as agronomists<sup>9-12</sup>.

Increasing crop biomass requires designing crop canopy to make maximum use of solar radiation and periods with favorable temperatures. However, the critical period for increasing biomass varies among the three crops. Our results show that high-yielding maize accumulates substantial biomass after anthesis<sup>13</sup> but wheat biomass increases mainly during shooting to anthesis<sup>14</sup>, while rice increases biomass both from tillering to anthesis, and after anthesis<sup>15</sup>. These patterns require management measures that vary among the three crops.

For maize, besides increasing plant density to increase total biomass, it is important to design an appropriate combination of hybrid (growing degree day, GDD) and sowing date according to local resources of solar radiation and temperature, in order to lengthen the growth period after anthesis and therefore increase the accumulation of biomass after anthesis. For tiller crops such as rice and wheat, the appropriate combination of cultivar and date and amount of sowing (wheat) or transplanting (rice) (depending on local solar and radiation and temperature) establishes a favorable dynamic structure of population and canopy; additionally, topdressing N fertilizer and irrigation (for irrigated wheat) during stem elongation is important to regulate crop population and canopy, and to increase the biomass accumulation from shooting to anthesis, while for rice, topdressing N fertilizer during tillering as well as heading is important to regulate crop population and canopy, and to increase the biomass accumulation from tillering to anthesis and after anthesis.

Nitrogen applications that meet, but do not exceed, crop N requirements are essential for achieving maximum grain yield and minimizing environmental risks, including nitrate-N leaching and gaseous losses. We found that N requirement for per unit grain were quite different (lower) in high-yielding systems compared with current yield levels. For instance, the N requirement per 1 Mg grain yield ( $N_{req.}$ ) for maize and wheat are only 17.4 and 24.3 kgN, respectively, under high yielding conditions - significantly lower (~20%) than N use at current yield levels<sup>16,17</sup>. In addition, more N accumulated in plants in the middle-late

growing season in our study<sup>14</sup>. This observation differs from some earlier studies that N accumulation in major cereals mainly occurs in the pre-anthesis stage, and that grain yields are largely depend on the translocation of pre-anthesis assimilates and N uptake<sup>18-20</sup>. Our observations highlight the importance of N management in the middle-late growing season: the post-anthesis stage in maize, the post-elongation stage in wheat, the heading stage for rice. For ISSM, the proportion of N applied during each period was calculated according to a crop N demand curve, with two applications for wheat (before planting and stem elongation stage), three applications for maize (before planting, 6-leaf stage and 10-leaf stage), and also three applications for rice (before planting, tillering and heading stage).

Our results proved that the ISSM is robust and can increase grain yield while optimizing N input and reducing environmental costs significantly. Our farmer survey suggested that ISSM is possible in practice, because we found about 20% and 5% of rice and wheat farmers respectively report yields already close to ISSM yields with similar amounts of N fertilizer (Extended Data Table 4). The ISSM will not cost farmer's additional inputs too much (same amounts of seed and N fertilizer, and almost same times of topdressing) and indeed will take significant benefit to farmers (significant increasing yield), however, there is still a long way to implement ISSM to farmers. Firstly, ISSM must carefully integrate crop (crop variety, sowing amount and date,...) and soil (soil tillage, fertilization, irrigation,...) management measures, according to local eco-conditions, therefore need more intensive localized agronomic researches; secondly, transferring this knowledge-riched approach to less educated small-holder farmers, need more investment and support from various public and private organizations.

### **Supplementary Discussion – Nr response to increasing N rate or N surplus**

It is not possible to measure all of the various Nr (reactive nitrogen) losses ( $\text{NH}_3$  volatilization, N leaching,  $\text{N}_2\text{O}$  emission) in-situ directly in a broad multi-site/year experiments; we and others<sup>21,22</sup> must develop a model to calculate Nr losses. Direct N losses and the environmental footprint of N fertilization are often expressed as a function of rates of N fertilizer application or N surplus in such models. Using an extensive and localized database, we established an empirical Nr loss model based on N application or N surplus for all three crops in China.

Earlier studies used a variety of methods to calculate Nr losses. For example, the IPCC

methodology<sup>5</sup> adopted a linear relationship to estimate direct N losses based on the amount of N added to agricultural soils. However, the relationship between agronomic management and N losses depends on more than just the amount of N input. Crops accumulate N from the soil in their biomass – and when N fertilizer input is less than or closely matches crop requirements, N uptake can consume the N available in the root-zone and thus limit N losses. Excessive soil N levels, which occur when N additions exceed crop requirements, can lead to nitrate accumulation and promote the production of N<sub>2</sub>O in soil or N leaching<sup>23-25</sup>. Consistent with this expectation, some recent field studies have reported exponential increases in direct N<sub>2</sub>O emissions and nitrate leaching with increasing N application rates, indicating a larger proportion of N is lost at high N application rates<sup>26-28</sup>.

In many cases it is more useful to compare N losses to levels of N surplus rather than N application rates. The IPCC method to estimate N<sub>2</sub>O emissions based on a fixed proportion of applied N inputs is likely to overestimate N losses from well-managed, high-yield, and high-input systems<sup>5</sup>.

Our results clearly indicated that both IP and ISSM could control the N surplus to around zero (Table 1) thereby substantially decreasing N leaching, N<sub>2</sub>O emission and N runoff (Fig. 1). Here, N surplus is calculated as N fertilizer minus N uptake by crops; it does not account for inputs of N via deposition<sup>29</sup> and irrigation water, and return of harvested straw to fields. Total environmental N inputs reached about 89 kg N ha<sup>-1</sup> for rice-wheat system in the Taihu region and about 104 kg N ha<sup>-1</sup> for wheat-maize system on the North China Plain<sup>30</sup>, so N losses can and do persist even when the N surplus is zero. In the longer run, low N surpluses on a regional scale lead to reduced losses via leaching and atmospheric fluxes, and so reduced environmental inputs of N.

Ammonia losses follow a different dynamic than do other N losses. Normally NH<sub>3</sub> volatilization occurs within 1 to 2 weeks after fertilization<sup>30</sup>. Consequently, the ability of N uptake by crop roots to acquire NH<sub>3</sub> is limited in this short period, resulting in a linear response of NH<sub>3</sub> volatilization to the N application rate (Extended Data Figure 2). We found that NH<sub>3</sub> volatilization in agricultural systems in China is quite high (Fig 1), partly because calcareous soils with high pH are widespread in China, partly because most N fertilizers used in China are easily volatilized urea and ammonia bicarbonate<sup>1</sup>. NH<sub>3</sub> volatilization represents a large loss from cropping systems. It also represents a significant threat to human health as well as the environment; NH<sub>3</sub> in the atmosphere reacts with other air pollutants to create small and dangerous aerosol particles (PM<sub>2.5</sub>) that can lodge deep in the lungs, causing asthma attacks, bronchitis, and heart attacks<sup>31,32</sup>. Mitigating NH<sub>3</sub> volatilization from agriculture should

focus on agronomic measures such as application method (deep application into the soil) as well as developing and adopting new fertilizers such as slow/controlled release coated fertilizer and urease inhibitors<sup>33</sup>.

Although we collected as complete and as large a database of N losses as possible, uncertainty in the magnitude of N losses still persists. The primary limitation to compiling a larger data set for this analysis was the absence of yield data in studies where GHG (or N losses) was measured. In this study, we included all data sources from Chinese journals (or theses) and ISI journals that met our criteria; we found the data from these two groups coincide well (Extended Data Figure 2-4). In addition to N surplus (or N application rate for  $\text{NH}_3$ ), N losses also depend on specific local conditions and other management practices; together these include topography, soil type, climate, N application method, and N fertilizer type<sup>34-36</sup>. Where possible, these environmental factors and crop practices affecting N losses should be taken into account in calculating N losses from any particular site or treatment. However, the intent of this study was to compare the N losses and GHG emission of different management approaches on a very broad scale across crops and across regions, to determine if a high-yielding treatment that optimized N supply (ISSM) also reduced potential N loss and GHG emission intensity. The soil, environmental conditions, and N application methods were the same for all four treatments in each experimental site in each year.

In summary, reducing N surplus by both increasing crop uptake through measures that increase crop yield and optimizing nutrient management should be a priority for scientists, policy-makers and farmers. In this study, the ISSM approach matched N supply from the soil and environment to N demand by the crops, through the right source, rate, timing, and placement of N fertilizer. At the same time, ISSM reduced N surplus by increasing grain yield through best management practices. This approach is particularly important in countries/regions where N fertilizer is overused but the potential for yield increase is still high.

### **Supplementary Discussion –increasing yield while reducing environmental costs**

To the extent that yields have already stagnated or reached yield plateaus in a large portion of the world's crop production area, current yield trends will not suffice to meet future demands on existing farmland<sup>37</sup>. More optimistic projections of future grain production suggest that it would be possible to achieve a 40-70% increase in yields for maize, wheat and rice globally by closing yield gaps<sup>38,39</sup>. The yields in ISSM treatment we obtained from these multi-sites/years field experiments (8.5, 8.9 and 14.2 Mg ha<sup>-1</sup>), are comparable to what are considered to be yield

potentials in the areas with the most favorable conditions and intensive agronomic management globally, and are 27%, 53% and 87% higher than those obtained in practice by Chinese farmers (6.7, 5.8, 7.6 Mg ha<sup>-1</sup>) (Table 1). The major factors explaining the gap between our ISSM treatment and farmers' practices are: (i) low efficiency of light and heat resource use due to low plant density, unsuitable sowing dates, short-duration varieties, and other poor crop management practices; (ii) poor nutrient and water management with either too large or too small additions<sup>40</sup>. The potential for substantial gains in grain yield for maize, wheat and rice suggests an opportunity to meet food demand on existing farmland in China.

We found that a conventional "bottom-up" approach, which sought to overcome the main limiting factors for yield and nutrient use efficiency increase (treatment IP), succeeded in increasing crop yields and reducing environmental costs. However, an integrated soil-crop system management (ISSM) approach yielded significantly better results, indicating that agroecological innovation in crop and soil management has great promise for increasing crop yield, improving the resource efficiency of agriculture, and greatly reducing harm to the environment<sup>13</sup>. This ISSM approach re-designed the whole production system to reduce yield gaps while at the same time optimizing resource inputs like fertilizers, according to our modern understanding of crop nutrient demand, and root zone nutrient supply and losses<sup>29</sup>.

Realizing the potential of agroecological innovations depends not only on progress in science and technology, but also on socioeconomic factors. We suggest that the reported "upper yield plateaus" for rice in China<sup>41</sup> may not represent a biophysical yield limitation, but rather the prevalence of extremely small farm sizes and growth in the proportion of part-time farmers. For example, in Heilongjiang province, Northeast China, the grain yield for rice in smallholding farms has remained at a plateau since the mid-1990s. However, large-scale farms in the same region made use of new technologies and economies of scale to continuously increase yields over the past 10 years (Extended Data Figure 5). Interestingly, we found about 20% and 5% of rice and wheat farmers respectively report yields close to ISSM yields; for maize, even the top 5% farmers do not achieve yields close to ISSM (Extended Data Table 4). This information shows that the most successful farmers are not using excessive fertilizer; at least their practices are closer to ISSM or IP than to the HY treatments. We believe that with rapid economic development, urbanization, and changes in land tenure, innovative agricultural technologies can be more widely adopted, and socioeconomic barriers to simultaneously increasing crop yield and mitigating environmental costs should diminish.

### Supplementary Literature Cited

1. Zhang, W.F. *et al.* New technologies reduce greenhouse gas emissions from nitrogenous fertilizer in China. *Proc. Natl. Acad. Sci. USA* **110**, 8375–8380. (2013).
2. Brentrup, F. & Pallière, C. GHG emission and energy efficiency in European nitrogen fertilizer production and use. In: *IFA Proceedings No. 639*. International Fertiliser Society, York, United Kingdom (2008).
3. Di, X., Nie, Z. & Zuo, T. Life cycle emission inventories for the fuels consumed by thermal power in China. *China Environ. Sci.* **25(5)**, 632–635 (2005) (in Chinese with English abstract).
4. Yuan, B., Nie, Z., Di, X. & Zuo, T. Life cycle inventories of fossil fuels in China (II): Final life cycle inventories. *Modern Chemical Industry* **26(3)**, 59–61 (2006) (in Chinese with English abstract).
5. IPCC. Energy. In: *2006 IPCC Guidelines for National Greenhouse Gas Inventories, Prepared by the National Greenhouse Gas Inventories Programme* (Eggelston, S. *et al.* Eds) IGES, Japan (2006).
6. National Bureau of Statistics of China. *China Energy Statistical Yearbook*. China Statistics Press, Beijing, China (2013).
7. National Bureau of Statistics of China. *China Statistical Yearbook*. China Statistics Press, Beijing, China (2013).
8. Williams, A. G., Audsley, E. & Sandars, D.L. Determining the environmental burdens and resource use in the production of agricultural and horticultural commodities. Final report to Defra on project IS0205. Available on [www.agrilca.org](http://www.agrilca.org) and [www.defra.gov.uk](http://www.defra.gov.uk) (2006).
9. Duvick, D.N. & Cassman, K.G. Post-green revolution trends in yield potential of temperate maize in the north-central United States. *Crop Sci.* **39**, 1622–1630 (1999).
10. Ciampitti, I.A. & Vyn, T.J. Physiological perspectives of changes over time in maize yield dependency on nitrogen uptake and associated nitrogen efficiencies: a review. *Field Crops Res.* **133**, 48–67 (2012).
11. Donmez, E., Sears, R.G., Shroyer, J.P. & Paulsen, G.M. Genetic gain in yield attributes of winter wheat in the great plains. *Crop Sci.* **41**, 1412–1419 (2001).
12. Shearman, V.J., Sylvester-Bradley, R., Scott, R.K. & Foulkes, M.J. Physiological processes associated with wheat yield progress in the UK. *Crop Sci.* **45**, 175–185 (2005).
13. Chen, X.P. *et al.* Integrated soil–crop system management for food security. *Proc. Natl. Acad. Sci. USA*, **108**, 6399–6404 (2011).
14. Meng, Q.F., Yue, S.C., Chen, X.P. & Zhang, F. S. Understanding dry matter and nitrogen

- accumulation with time-course for high-yielding wheat production in China. *PLoS One* **8**, e68783 (2013).
15. Li, H.W., Liu, L.J., Wang, Z.Q. & Zhang, J.H. Agronomic and physiological performance of high-yielding wheat and rice in the lower reaches of Yangtze River of China. *Field Crops Res.* **133**, 119–129 (2012)
  16. Hou, P. *et al.* Grain yields in relation to N requirement: Optimizing nitrogen management for spring maize grown in China. *Field Crop Res.* **129**, 1–6 (2012).
  17. Yue, S.C. *et al.* Change in nitrogen requirement with increasing grain yield for winter wheat. *Agron. J.* **104**, 1–7 (2012).
  18. Cox, M.C., Qualset, C.O. & Rains, D.W. Genetic variation for nitrogen assimilation and translocation in wheat. 2. Nitrogen assimilation in relation to grain yield and protein. *Crop Sci.* **25**, 435–440 (1985).
  19. Heitholt, J.J., Croy, L.I., Maness, N.O. & Nguyen, H.T. Nitrogen partitioning in genotypes of winter wheat differing in grain N concentration. *Field Crops Res.* **23**, 133–144 (1990).
  20. Papakosta, D.K. & Gagianas, A.A. Nitrogen and dry-matter accumulation, remobilization, and losses for Mediterranean wheat during grain filling. *Agron. J.* **83**, 864–870 (1991).
  21. Cui, Z.L. *et al.* Closing the yield gap could reduce projected greenhouse gas emissions: a case study of maize production in China. *Glob. Change Bio.* **19**, 2467–2477 (2013).
  22. Grassini, P. & Cassman, K.G. High-yield maize with large net energy yield and small global warming intensity. *Proc. Natl. Acad. Sci. USA* **109**, 1074–1079 (2012).
  23. Hong, N., Scharf, P.C., Davis, J.G. & Sudduth, K.A. Economically optimal nitrogen rate reduces soil residual nitrate. *J. Environ. Qual.* **36**, 354–362 (2007).
  24. Kim, D., Hernandez-Ramirez, G. & Giltrap, D. Linear and nonlinear dependency of direct nitrous oxide emissions on fertilizer nitrogen input: A meta-analysis. *Agric. Ecosyst. Environ.* **168**, 53–65 (2013).
  25. Van Groenigen, J.W. *et al.* Towards an agronomic assessment of N<sub>2</sub>O emissions: a case study for arable crops. *Eur. J. Soil Sci.* **61**, 903–913 (2010).
  26. Goulding, K. Nitrate leaching from arable and horticultural land. *Soil Use Manage.* **16**, 145–151 (2000).
  27. Hoben, J.P., Gehl, R.J., Millar, N. & Robertson, G.P. Nonlinear nitrous oxide (N<sub>2</sub>O) response to nitrogen fertilizer in on-farm corn crops of the US Midwest. *Glob. Change*

- Biol.***17**, 1140–1152 (2011).
28. Xia, Y. & Yan, X. Ecologically optimal nitrogen application rates for rice cropping in the Taihu Lake region of China. *Sustain. Sci.***7**(1), 33–44 (2012).
  29. Liu, X.J. *et al.* Enhanced nitrogen deposition over China. *Nature***494**, 459–462. (2013).
  30. Ju, X. T. *et al.* Reducing environmental risk by improving N management in intensive Chinese agricultural systems. *Pro. Natl. Acad. Sci. USA* **106**, 3041–3046 (2009).
  31. Paulot, F. & Jacob, D.J. Hidden cost of U.S. agricultural exports: particulate matter from ammonia emissions. *Environ. Sci. Technol.***48**, 903–908 (2014).
  32. Stokstad, E. Ammonia pollution from farming may exact hefty health costs. *Science***343**, 238 (2014).
  33. Chien, S.H., Prochnow, L.I. & Cantarella, H. Recent developments of fertilizer production and use to improve nutrient efficiency and minimize environmental impacts. *Adv. Agron.***102**, 267–322 (2009).
  34. Snyder, C.S., Bruulsema, T.W., Jensen, T.L. & Fixen, P.E. Review of greenhouse gas emissions from crop production systems and fertilizer management effects. *Agric. Ecosyst. Environ.***133**, 247–266 (2009).
  35. Stehfest, E., Bouwman, L. N<sub>2</sub>O and NO emission from agricultural fields and soils under natural vegetation: summarizing available measurement data and modeling of global annual emissions. *Nutr. Cycl. Agroec.***74**, 207–228, (2006)
  36. Chien, S.H., Prochnow, L.I. & Cantarella, H. Recent developments of fertilizer production and use to improve nutrient efficiency and minimize environmental impacts. *Adv. Agron.* **102**, 267–322 (2009).
  37. Ray, D.K., Mueller, N.D., West, P.C. & Foley, J.A. Yield trends are insufficient to double global crop production by 2050. *PLoS ONE*, e66428 (2013).
  38. Mueller, N.D., Gerber, J.S., Johnston, M., Ray, D.K. & Foley, J.A. Closing yield gaps through nutrient and water management. *Nature***490**, 254–257 (2012).
  39. Licker, R. *et al.* Mind the gap: how do climate and agricultural management explain the ‘yield gap’ of croplands around the world? *Glob. Ecol. Biogeogr.***19**, 769–782 (2010).
  40. Shen, J.B. *et al.* Transforming agriculture in China: From solely high yield to both high yield and high resource use efficiency. *Glob. Food Secur.***2**, 1–8 (2013).
  41. Grassini, P., Eskridge, K.M. & Cassman, K.G. Distinguishing between yield advances and yield plateaus in historical crop production trends. *Nat. Commun.***4**, 2918–2928 (2013).
